# Supplementary material
Source: publisher figshare collection journal article supplement (https://gsapubs.figshare.com/articles/dataset/_/12348869)
Supplement: Supplementary file 1 [file 1]

TABLE DR1

| ichnospecies                                                          | age                             | stratigraphy                                            | occurrence                                                          | references                                                                                     |
|-----------------------------------------------------------------------|---------------------------------|---------------------------------------------------------|---------------------------------------------------------------------|------------------------------------------------------------------------------------------------|
| <b><i>Treptichnus pedum</i> (Seilacher, 1955)</b>                     |                                 |                                                         |                                                                     |                                                                                                |
|                                                                       | Middle Ordovician               | Gongwusu Fm.                                            | Inner Mongolia (China)                                              | Li 1993                                                                                        |
|                                                                       | Early Ordovician                | Melez Chograne Fm.                                      | Libya                                                               | Seilacher 1970                                                                                 |
|                                                                       | ?Furongian / ?Early Ordovician  | Kellys Island Fm., Little Bell Island Fm.               | E Newfoundland (Canada)                                             | Fillion & Pickerill 1990                                                                       |
|                                                                       | Furongian                       | Wiśniówka Fm.                                           | Holy Cross Mountains (Poland)                                       | Orłowski & Żylińska 1996                                                                       |
|                                                                       | Middle Cambrian                 | Kaili Fm.                                               | Guizhou Province (S China)                                          | Yang 1994, Wang & Wang 2006                                                                    |
|                                                                       | Early Cambrian to Tremadoc      | Vegadeo Limestone, Herreria Sdst., Oville Fm., Cabos de | Cantabrian Mountains (N Spain)                                      | Crimes <i>et al.</i> 1977, Legg 1985, Baldwin 1977                                             |
|                                                                       | Early to Middle Cambrian        | Bright Angel Shale                                      | Grand Canyon, USA                                                   | Seilacher 1956, Elliott & Martin 1987                                                          |
|                                                                       | Early Cambrian                  | Brenvik Fm.                                             | Finnmark (Norway)                                                   | Banks 1970, Feyn & Glaessner 1979                                                              |
|                                                                       | Early Cambrian                  | Mickwitzia sandstone                                    | South central Sweden                                                | Jensen 1997                                                                                    |
|                                                                       | Early Cambrian                  | Lontova Fm.                                             | Estonia                                                             | Palj <i>et al.</i> 1979, 1983                                                                  |
|                                                                       | Early Cambrian                  | Ocieski Fm.                                             | Holy Cross Mountains (Poland)                                       | Orłowski 1989                                                                                  |
|                                                                       | Early Cambrian                  | Platysolenites Zone                                     | SE Poland                                                           | Paczeńska 1985, 1986                                                                           |
|                                                                       | Early Cambrian                  | Rovno Fm.                                               | Ukraine                                                             | Fedonkin 1983, Palj 1976                                                                       |
|                                                                       | Early Cambrian                  | Torreárboles Fm.                                        | Sierra de Córdoba; Jaraicejo, East Lusitanian-Alcudian zone (Spain) | Fedonkin <i>et al.</i> 1983, Liñán 1984, Monteserin <i>et al.</i> 1987                         |
|                                                                       | Early Cambrian                  | Detrital Beds                                           | Sierra de Guadalupe (Spain)                                         | Liñán 1984                                                                                     |
|                                                                       | Early Cambrian                  | Buen Fm.                                                | North Greenland                                                     | Bryant & Pickerill 1990                                                                        |
|                                                                       | Early Cambrian                  | Boya Fm.                                                | Cassiar Mountains (Canada)                                          | Fritz 1980, Fritz <i>et al.</i> 1983, Droser <i>et al.</i> 1999                                |
|                                                                       | Early Cambrian                  | lower Vampire Formation                                 | Wernecke Mountains (Canada)                                         | Nowlan <i>et al.</i> 1985, Droser <i>et al.</i> 1999                                           |
|                                                                       | Early Cambrian                  | Map Unit 12, upper submember                            | Mackenzie Mountains (Canada)                                        | Fritz & Crimes 1985, Droser <i>et al.</i> 1999                                                 |
|                                                                       | Early Cambrian                  | Random Fm.                                              | SE Newfoundland (Canada)                                            | Narbonne <i>et al.</i> 1987                                                                    |
|                                                                       | Early Cambrian                  | Deep Spring Fm., Campito Fm.                            | White-Inn Mountains (California, USA)                               | Alpert 1977                                                                                    |
|                                                                       | Early Cambrian                  | Puerto Blanco Fm.                                       | Pitiquito, Sonora, Mexico                                           | Sour-Tovar <i>et al.</i> 2007                                                                  |
|                                                                       | Early Cambrian                  | Neobolus Beds                                           | Salt Range (Pakistan)                                               | Seilacher 1955                                                                                 |
|                                                                       | Early Cambrian                  | Lolab & Tal Fms                                         | Himalaya (India)                                                    | Shah & Sudan 1983, Singh & Rai 1983                                                            |
|                                                                       | Early Cambrian                  | Yu'an-shan Fm.                                          | Maotianshan, Chengjiang, Yunnan Province (S China)                  | Zhu 1997                                                                                       |
|                                                                       | Early Cambrian                  | no precise data                                         | Yunnan, Sichuan Province (S China)                                  | Li & Yang 1988                                                                                 |
|                                                                       | Early Cambrian                  | Parachilna Fm.                                          | Flinders Range (Australia)                                          | Daily 1972                                                                                     |
|                                                                       | Early Cambrian                  | Arumbera Fm., Dinkey Creek beds                         | Amadeus Basin (Australia)                                           | Glaessner 1969, Daily 1972, Walter <i>et al.</i> 1989                                          |
|                                                                       | Early Cambrian                  | Gross Aub Fm., Nomsas Fm.                               | S Namibia                                                           | Germs 1972, Crimes & Germs 1982, Germs 1983, Geyer & Uchman 1995                               |
|                                                                       | Cambrian                        | Balcarce Fm.                                            | Buenos Aires Province (Argentina)                                   | Regalia & Herrera 1981                                                                         |
|                                                                       | Late Ediacaran / Early Cambrian | Chapel Island Fm. (GSSP and below)                      | SE Newfoundland (Canada)                                            | Crimes & Anderson 1985, Narbonne <i>et al.</i> 1987, Brasier <i>et al.</i> 1994, Landing 1994, |
|                                                                       | Late Ediacaran / Early Cambrian | Tornetrask Fm.                                          | Dividalen Group (N Sweden)                                          | Jensen & Grant 1998                                                                            |
|                                                                       | Late Ediacaran / Early Cambrian | Pusa Shales                                             | Montes de Toledo (Central Spain)                                    | Brasier <i>et al.</i> 1979, Palacios Medrano 1989                                              |
|                                                                       | Late Ediacaran / Early Cambrian | Ingia Fm., Backbone Ranges Fm., Vampire Fm.             | Mackenzie Mountains (NW Canada)                                     | MacNaughton & Narbonne 1999                                                                    |
| <b><i>Treptichnus bifurcus</i> (Seilacher, 1955)</b>                  |                                 |                                                         |                                                                     |                                                                                                |
|                                                                       | Early Cambrian                  | Mickwitzia sandstone                                    | South central Sweden                                                | Jensen 1997                                                                                    |
| <b><i>Treptichnus rectangularis</i> Orłowski &amp; Żylińska, 1996</b> |                                 |                                                         |                                                                     |                                                                                                |
|                                                                       | Furongian                       | Wiśniówka Fm.                                           | Holy Cross Mountains (Poland)                                       | Orłowski & Żylińska 1996                                                                       |
| <b><i>Treptichnus arcus</i> Wang &amp; Wang, 2006</b>                 |                                 |                                                         |                                                                     |                                                                                                |
|                                                                       | Middle Cambrian                 | Kaili Fm.                                               | Guizhou Province (S China)                                          | Wang & Wang 2006                                                                               |
| <b><i>Treptichnus taijiangensis</i> Wang &amp; Wang, 2006</b>         |                                 |                                                         |                                                                     |                                                                                                |
|                                                                       | Middle Cambrian                 | Kaili Fm.                                               | Guizhou Province (S China)                                          | Wang & Wang 2006                                                                               |
| <b><i>Trichophycus venosus</i> (Miller, 1879)</b>                     |                                 |                                                         |                                                                     |                                                                                                |
|                                                                       | Early Cambrian                  | Mickwitzia sandstone                                    | South central Sweden                                                | Jensen 1997                                                                                    |
| <b><i>Trichophycus tripleurum</i> Geyer and Uchman, 1995</b>          |                                 |                                                         |                                                                     |                                                                                                |
|                                                                       | Early Cambrian                  | Gross Aub Fm., Nomsas Fm.                               | S Namibia                                                           | Germs 1972, Crimes & Germs 1982, Germs 1983, Geyer & Uchman 1995                               |

**Table DR1. Palaeogeographical and stratigraphical distribution of Late Precambrian to Lower Palaeozoic treptichnid taxa. Fm= Formation.****References**

- Alpert, S. P. In *Trace Fossils*, edited by Crimes, T. P. & Harper, J. C. (*Geological Journal, Special Issue 9*, Liverpool, 1977), Vol. 2, pp. 1-8.
- Baldwin, C. T. In *Trace Fossils*, edited by Crimes, T. P. & Harper, J. C. (*Geological Journal Special Issue 9*, Liverpool, 1977), Vol. 2, pp. 9-40.
- Bank, N. L. In *Trace Fossils*, edited by Crimes, T. P. & Harper, J. C. (*Geological Journal Special Issue 9*, Liverpool, 1970), pp. 19-34.
- Brasier, M. D., Pense, A., & San Jose, M. A. d. Discovery of an important fossiliferous Precambrian-Cambrian sequence in Spain. *Estudios Geológicos* **35**, 379-383 (1979).
- Brasier, M. D., Cowie, J. & Taylor, M. Decision on the Precambrian-Cambrian boundary. *Episodes* **17**, 3-8 (1994).
- Bryant, I. D. & Pickering, R. K. Lower Cambrian trace fossils from the Buen Formation of central North Greenland: preliminary observations. *Grönlands Geologiske Undersøgelse, Rapport* **147**, 44-62 (1990).
- Crimes, T. P., Legg, I., Marcos, A. & Arborely, M. In *Trace Fossils*, edited by Crimes, T. P. & Harper, J. C. (*Geological Journal Special Issue 3*, Liverpool, 1977), Vol. 2, pp. 91-138.
- Crimes, T. P. & Gerns, G. J. B. Trace fossils from the Nama Group (Precambrian-Cambrian) of Southwest Africa (Namibia). *Journal of Paleontology* **56**(4), 890-907 (1982).
- Crimes, T. P. & Anderson, M. M. Trace fossils from Late Precambrian-Early Cambrian strata of southeastern Newfoundland (Canada): temporal and environmental implications. *Journal of Paleontology* **59**(2), 310-343 (1985).
- Daily, B. In *Stratigraphic Problems of the Late Precambrian and Early Cambrian*, edited by Jones, J. B. & McGowin, B. (University of Adelaide Centre for Precambrian Research, *Special Papers 1*, Adelaide, 1972), pp. 13-41.
- Droser, M. L., Gehling, J. G. & Jensen, S. When the worm turned: Concordance of Early Cambrian ichnofabric and trace-fossil record in siliclastic rocks of South Australia. *Geology* **27**(7), 625-628 (1999).
- Elliott, D. K. & Martin, D. L. A new trace fossil from the Cambrian Bright Angel Shale, Grand Canyon, Arizona. *Journal of Paleontology* **61**(4), 641-648 (1987).
- Fedorin, M. A. In *[The Vendian of the Ukraine]*, edited by Velikanov, A. A., Aseeva, E. A. & Fedorin, M. A. (Kiev (Izdaniye Naukova Dumka), 1983), pp. 128-139 (In Russian).
- Fedorin, M. A., Liñán, E. & Perejón, A. Icnofósiles de las rocas precámbricas-cámbricas de la Sierra de Córdoba, España. *Boletín de la Real Sociedad Española de Historia Natural. Sección Geológica* **81**(1-2), 125-138 (1983).
- Filion, D. & Pickering, R. K. Ichology of the Upper Cambrian? to Lower Ordovician Bell Island and Wabana groups of eastern Newfoundland, Canada. *Palaentographica Canadiana* **7**, 1-119 (1990).
- Feyn, S. & Glaessner, M. F. *Platysolenites*, other animal fossils, and the Precambrian-Cambrian transition in Norway. *Norsk Geologisk Tidsskrift* **59**, 25-46 (1979).
- Fritz, W. H. International Precambrian-Cambrian boundary working group's 1979 field study to Mackenzie Mountains, Northwest Territories, Canada. *Geological Survey of Canada, Paper* **89**(1A), 41-45 (1980).
- Fritz, W. H., Narbonne, G. M. & Gordy, S. P. Strata and trace fossils near the Precambrian-Cambrian boundary, Mackenzie, Selwyn, and Wernecke mountains, Yukon and Northwest Territories. *Geological Survey of Canada, Paper* **83**(1B), 365-375 (1983).
- Fritz, W. H. & Crimes, T. P. Lithology, trace fossils and correlation of Precambrian-Cambrian boundary beds, Cassiar Mountains, north-central British Columbia. *Geological Survey of Canada, Paper* **83**(13), 1-24 (1985).
- Gehling, J. G., Jensen, S., Droser, M. L., Myrow, P. M., and Narbonne, G. M. Burrowing below the basal Cambrian GSSP, Fortune Head, Newfoundland. *Geological Magazine* **138**, 213-218 (2001).
- Gerns, G. J. B. Trace fossils from the Nama Group, South-West Africa. *Journal of Paleontology* **46**(6), 864-870 (1972).
- Gerns, G. J. B. In *Evolution of the Damara Orogen of South West Africa/Namibia*, edited by Miller, R. M. (*Special Publication of the Geological Society of South Africa* **11**, Cape Town, 1983), pp. 89-114.
- Geyer, G. & Uchman, A. Ichnofossil assemblages from the Nama Group (Neoproterozoic - Lower Cambrian) in Namibia and the Proterozoic-Cambrian boundary problem revisited. *Beringia Special Issue 2*, 175-202 (1995).
- Glaessner, M. F. Trace fossils from the Precambrian and basal Cambrian. *Lethaia* **2**(4), 369-393 (1969).
- Jensen, S. Trace fossils from the Lower Cambrian Mickwitzia sandstone, south-central Sweden. *Fossils and Strata* **42**, 1-110 (1997).
- Jensen, S. & Grant, S. W. F. Trace fossils from the Dividalen Group, northern Sweden: implications for Early Cambrian biostratigraphy of Baltica. *Norsk Geologisk Tidsskrift* **78**, 305-317 (1998).
- Landing, E. Precambrian-Cambrian boundary ratified and a new perspective of Cambrian time. *Geology* **22**, 179-82. (1994).
- Li, R. Trace fossils and ichnofacies of Middle Ordovician Gongxusu Formation, Zhuozishan, Inner Mongolia. *Acta Palaeontologica Sinica* **32**(1), 88-104 (1993) (In Chinese with English summary).
- Liñán, E. Los icnofósiles de la Formación Torrealeboles (?Precámbrico-Cámbrico inferior) en los alrededores de Fuente de Cantos, Badajoz. *Cuadernos de Laboratorio Geológico de Laxe* **8**, 47-74 (1984).
- MacNaughton, R. B. & Narbonne, G. M. Evolution and Ecology of Neoproterozoic-Lower Cambrian Trace Fossils, NW Canada. *Palaio* **14**, 97-115 (1999).
- Monteserín, V. et al., (Instituto Geológico y Minero de España, 1987), pp. 46.
- Narbonne, G. M., Myrow, P., Landing, E. & Anderson, M. M. A candidate stratotype for the Precambrian-Cambrian boundary, Fortune Head, Burin Peninsula, southeaster Newfoundland. *Canadian Journal of Earth Sciences* **24**(7), 1277-1293 (1987).
- Nowlan, G. S., Narbonne, G. M. & Fritz, W. H. Small shelly fossils and trace fossils near the Precambrian-Cambrian boundary in the Yukon Territory, Canada. *Lethaia* **18**, 233-256 (1985).
- Orłowski, S. Trace fossils in the Lower Cambrian sequence in the Świętokrzyskie Mountains, Central Poland. *Acta Palaeontologica Polonica* **34**, 211-231 (1989).
- Orłowski, S. & Zyrinśka, A. Non-artropod burrows from the Middle and Late Cambrian of the Holy Cross Mountains, Poland. *Acta Palaeontologica Polonica* **41**(4), 385-409 (1996).
- Paczuska, J. Skamieniałości śladowe górnego wendy i dolnego kambru południowej Lubelszczyzny [Upper Vendian and Lower Cambrian ichnofossils in the southern Lublin Region]. *Kwartalnik Geologiczny* **29**(2), 255-270 (1985).
- Paczuska, J. Upper Vendian and Lower Cambrian ichnocoenoses of the Lubin region. *Instytut Geologiczny, Biuletyn* **355**, 31-47 (1986).
- Palacios Medrano, T. Microfósiles de pared orgánica del Proterozoico superior (Región central de la Península Ibérica). *Memorias del Museo Paleontológico de la Universidad de Zaragoza* **3**(2), 1-91 (1989).
- Palić, V. M. In *Paleontologiya i stratigrafiya verkhnego dokembriya i nizhnego paleozoya jugo-zapadno vostochno-evropejskoj platformy* [*Paleontology and Stratigraphy of Upper Precambrian and Lower Paleozoic of the South-West of Eastern-European Platform*] (Naukova Dumka, Kiev, 1976), pp. 63-76 (In Russian).
- Palić, V. M., Post, E. & Fedorin, M. In *Paleontologiya verkhnedokembrijskikh i kembrijskikh otlozhenij Vostochno-Evropejskoj platformy* [*Upper Precambrian and Cambrian paleontology of the East-European Platform*], edited by Keller, B. M. & Rozanov, A. Y. (Akademiya Nauk SSSR, Moscow, 1979), pp. 49-82 (In Russian). [English translation in: Palić, V. M. P. Regalia, G. M. & Herrera, H. E. Phycodes aff. pedum (traza fosi) en estratos cuarcíticos de San Manuel, Sierras septentrionales de la Provincia de Buenos Aires. *Revista de la Asociación Geológica Argentina* **36**(3), 257-261 (1981).
- Seilacher, A. Spuren und Fazies im Unterkambrium. *Akademie der Wissenschaften und der Literatur zu Mainz, mathematisch-naturwissenschaftliche Klasse Abhandlungen* **10**, 373-399 (1955).
- Seilacher, A. Der Beginn des Kambriums als biologische Wende. *Neues Jahrbuch fuer Geologie und Palaeontologie* **Abh.** **103**(1-2), 155-180 (1956).
- Shah, S. K. & Sutan, C. S. Trace fossils from the Cambrian of Kashmir and their stratigraphic significance. *Journal of the Geological Society of India* **24**(4), 194-202 (1983).
- Singh, I. B. & Rai, V. Fauna and biogenic structures in the Krol-Tal succession (Vendian-Early Cambrian), Lesser Himalaya: their biostratigraphic and palaeoecological significance. *Journal of the Palaeontological Society of India* **28**, 67-90 (1983).
- Sour-Tovar, F., Hagadorn, J. W. & Hultón-Rubio, T. Ediacaran and Cambrian index fossils from Sonora, Mexico. *Paleontology* **50** (1), 169-175 (2007).
- Walter, M. R. Elphistone, R. & Heys, G. R. Proterozoic and Early Cambrian trace fossils from the Amadeus and Georgina Basins, central Australia. *Alcheringa* **13**, 209-256 (1989).
- Wang, Y. & Wang, P. [Ichnofossil Treptichnus from the Kaili Formation at Taijiang County, Guizhou Province]. *Geological Review* **52**(1), 1-10 (2006) (In Chinese, with English summary).
- Yang, S. [Trace fossils from Early-Middle Cambrian Kaili Formation of Taijiang, Guizhou]. *Acta Palaeontologica Sinica* **33**(3), 350-358 (1994) (In Chinese, with English summary).
- Zhu, M. Precambrian-Cambrian trace fossils from Eastern Yunnan, China: implications for Cambrian explosion. *Bulletin of National Museum of Natural Science* **10**, 275-312 (1997).

**TABLE DR2**

| track      | nb. of rotations | min. angle ( $\alpha$ ) in ° | max. angle ( $\alpha$ ) | average angle ( $\alpha$ ) | %CW       | %ACW      | %S       |
|------------|------------------|------------------------------|-------------------------|----------------------------|-----------|-----------|----------|
| 1          | 16               | 10                           | 83                      | 39.5                       | 44        | 56        | 0        |
| 2          | 13               | 20                           | 56                      | 33.7                       | 100       | 0         | 0        |
| 3          | 20               | 9                            | 53                      | 29                         | 95        | 5         | 0        |
| 4          | 6                | 5                            | 45                      | 19.2                       | 50        | 50        | 0        |
| 6          | 8                | 5                            | 85                      | 44.9                       | 88        | 12        | 0        |
| 7          | 18               | 6                            | 46                      | 20.5                       | 28        | 72        | 0        |
| 8          | 23               | 4                            | 55                      | 23.7                       | 48        | 52        | 0        |
| 9          | 17               | 0                            | 61                      | 24.5                       | 0         | 88        | 12       |
| 10         | 19               | 3                            | 62                      | 24.5                       | 42        | 58        | 0        |
| 11         | 8                | 10                           | 50                      | 23.4                       | 88        | 12        | 0        |
| 14         | 21               | 0                            | 67                      | 25.4                       | 58        | 33        | 9        |
| 15         | 9                | 1                            | 35                      | 18.1                       | 56        | 44        | 0        |
| 16         | 47               | 0                            | 73                      | 26.2                       | 49        | 40        | 11       |
| 17         | 4                | 18                           | 64                      | 45.7                       | 75        | 25        | 0        |
| 18         | 7                | 7                            | 27                      | 14                         | 28        | 72        | 0        |
| <b>ALL</b> | <b>236</b>       | <b>0</b>                     | <b>85</b>               | <b>26.7</b>                | <b>54</b> | <b>43</b> | <b>3</b> |

**Table DR2. Directional changes in the locomotion of *Priapulus***

caudatus (18 horizontal tracks; see Methods section).  $a$ = angle in ° between 2 successive cycles. CW= clockwise, ACW= anticlockwise, S= straight ( $a= 0^\circ$ ).

TABLE DR3

| ichnospecies                     | coll. n°         | stratigraphy         | age         | occurrence     | nb. of rotations | min. angle (a) in ° | max. angle (a) | average angle (a) | %CW | %ACW | %S |
|----------------------------------|------------------|----------------------|-------------|----------------|------------------|---------------------|----------------|-------------------|-----|------|----|
| <i>Treptichnus pedum</i>         | SGU 8598         | Mickwitzia Sandstone | E. Cambrian | Lugnås, Sweden | 41               | 8                   | 115            | 40.7              | 54  | 46   | 0  |
| <i>Treptichnus pedum</i>         | no number        | Meishucun            | E. Cambrian | China          | 12               | 5                   | 74             | 32.6              | 59  | 41   | 0  |
| <i>Treptichnus pedum</i>         | MGUH 19644 (T1)  | Buen Fm.             | E. Cambrian | N. Greenland   | 10               | 2                   | 34             | 17.9              | 40  | 60   | 0  |
| <i>Treptichnus pedum</i>         | MGUH 19644 (T2)  | Buen Fm.             | E. Cambrian | N. Greenland   | 9                | 5                   | 73             | 30.9              | 45  | 55   | 0  |
| <i>Treptichnus pedum</i>         | no number        | Wiśniówka Fm.        | Furongian   | Poland         | 12               | 5                   | 84             | 41.2              | 30  | 70   | 0  |
| <i>Treptichnus rectangularis</i> | MUZWG ZI/29/3163 | Wiśniówka Fm.        | Furongian   | Poland         | 10               | 76                  | 101            | 88.5              | 50  | 50   | 0  |
| <i>Treptichnus rectangularis</i> | MUZWG ZI/29/3184 | Wiśniówka Fm.        | Furongian   | Poland         | 5                | 27                  | 82             | 50.8              | 40  | 60   | 0  |
| <i>Treptichnus bifurcus</i>      | RMX 3337         | Mickwitzia Sandstone | E. Cambrian | Lugnås, Sweden | 19               | 4                   | 130            | 54                | 79  | 21   | 0  |

Table DR3. Directional changes in treptichnid burrow systems from the Cambrian. a = angle in ° between 2 successive cycles. CW= clockwise, ACW= anticlockwise, S= straight (a= 0°).



# CAMBRIAN

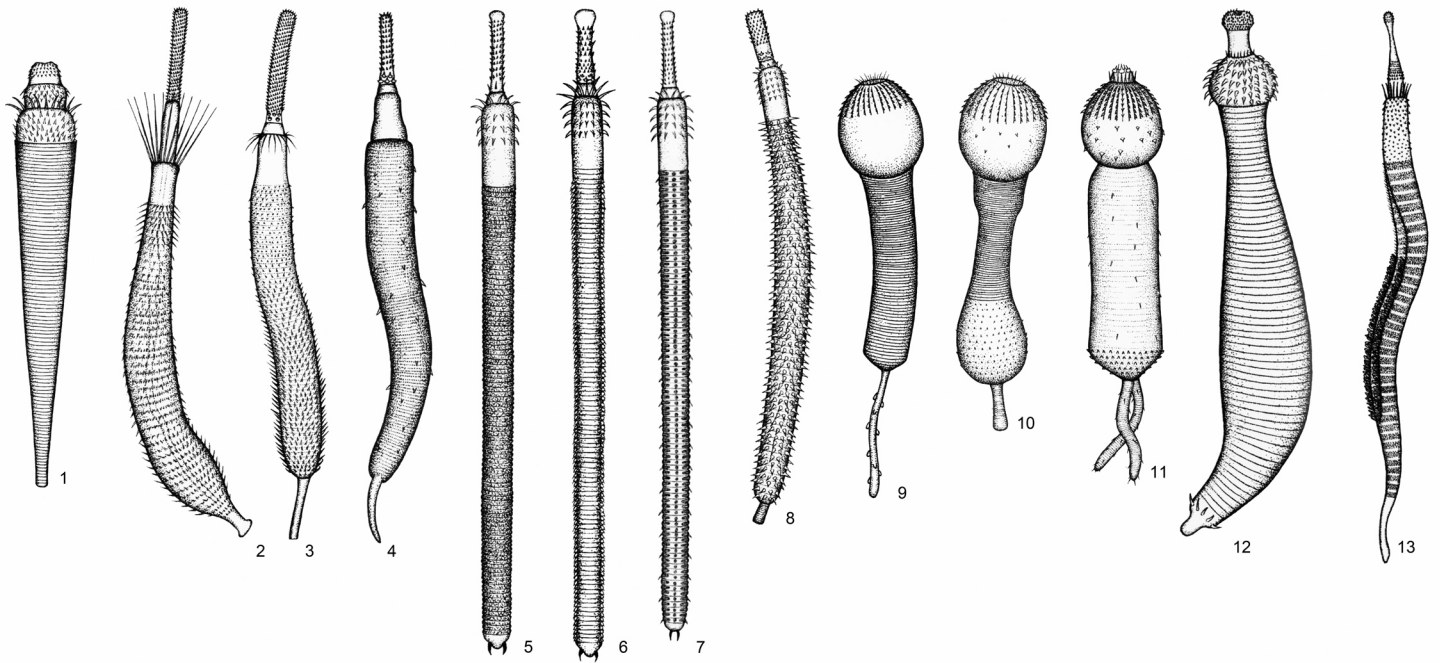

# RECENT

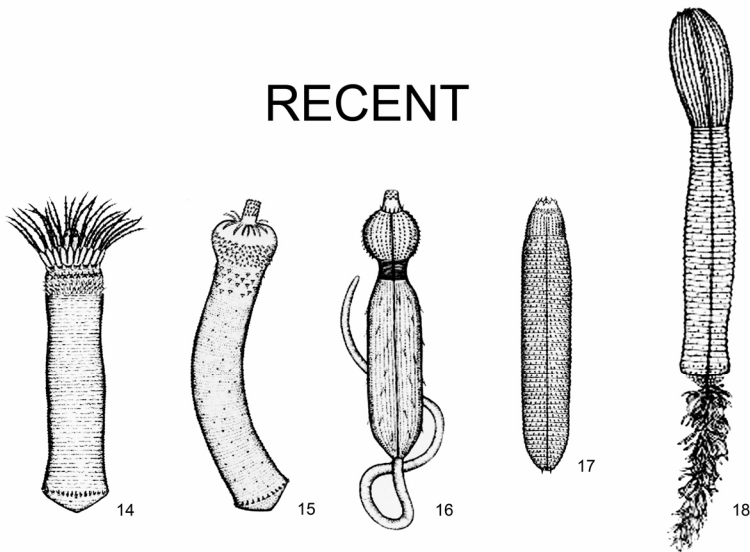

**Figure DR1.** Morphological diversity of Cambrian (1-13) and Recent (14-18) priapulid worms. 1-11 are from the Early Cambrian Chengjiang biota, 12 and 13 from the Middle Cambrian Burgess Shale biota. After Huang *et al.* 2004a, b and Huang 2005. Not to scale.

1, *Paraselkirkia sinica* ; 2, *Corynetis brevis* ; 3, *Anningvermis multispinosus* ; 4, *Xianjiella lubrica* ; 5, *Maotianshania cylindrica* ; 6, *Cricocosmia jinningensis* ; 7, *Tabelliscolex hexagonus* ; 8, *Tylotites petiolaris* ; 9, *Xiaoheiqingella peculiaris* ; 10, *Yunnanpriapulid halteroformis* ; 11, *Cambropriapulid sinicum* ; 12, *Ottoia prolifica* ; 13, *Louisella pedunculata* ; 14, *Maccabeus tentaculus* ; 15, *Meiopriapulid fijiensis* ; 16, *Tubiluchus corallicola* ; 17, *Halicryptus spinulosus* ; 18, *Priapulid caudatus*.

## References :

Huang, D.-Y., Vannier, J., and Chen, J.-Y., 2004a, Anatomy and lifestyles of Early Cambrian priapulid worms exemplified by *Corynetis* and *Anningella* from the Early Cambrian Maotianshan Shale (SW China): *Lethaia*, v. 37, p. 21-33, doi: 10.1080/00241160410005088.

Huang, D.-Y., Vannier, J., and Chen, J.-Y., 2004b, Recent Priapulidae and their early Cambrian ancestors: comparisons and evolutionary significance: *Geobios*, v. 37, p. 217-228, doi: 10.1016/j.geobios.2003.04.004.

Huang, D.-Y., 2005, Early Cambrian worms from SW China: morphology, systematics, lifestyles and evolutionary significance. Unpublished PhD thesis, Université Claude Bernard Lyon 1, 247 pp.



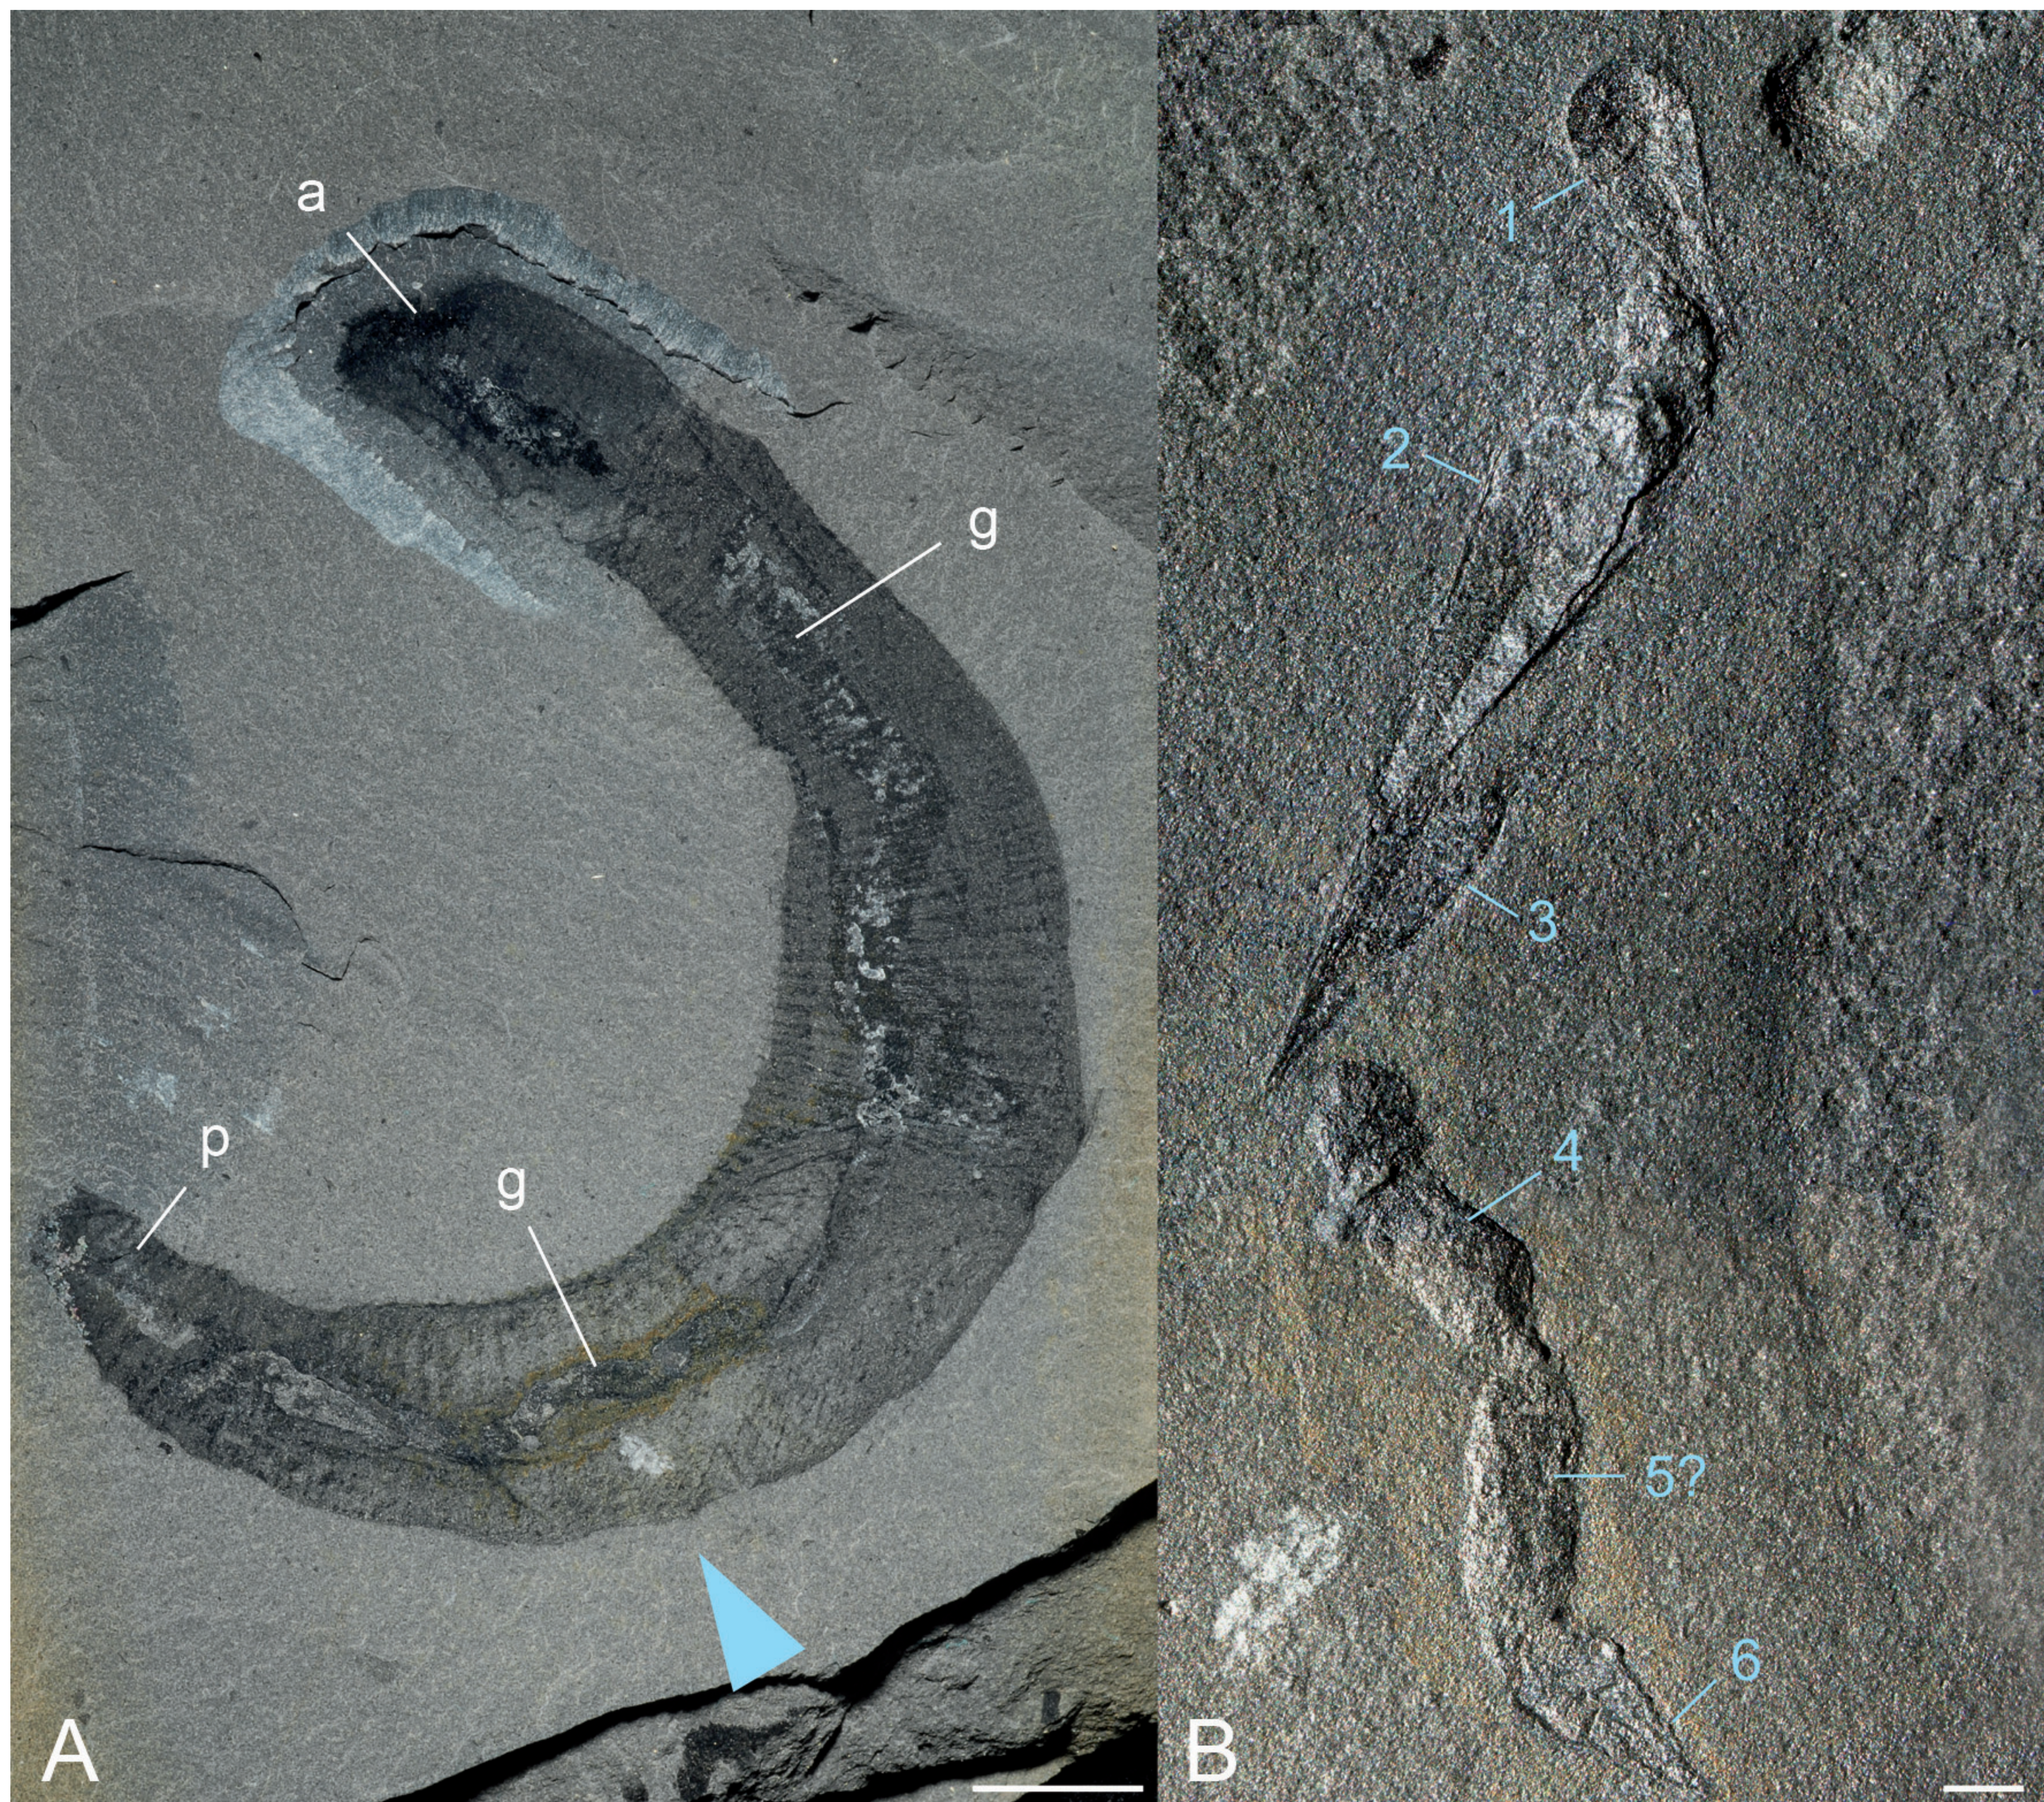

**Figure DR2** *Ottoia prolifica* (Walcott, 1911), a priapulid worm from the Middle Cambrian Burgess Shale. A: general view. B: details of preserved gut contents with 5 or 6 hyolithid shells (probably *Haplophrentis carinatus*). a, p= anterior and posterior end of the worm; g= gut. Scale bars: A, 10 mm; B, 1 mm.



Vannier et al.

**Video DR1.mov**
